# Supplementary material for: Prevalence of Cancer in District Banu Khyber Pakhtunkhwa, Pakistan<strong> </strong>
Source: Preprints.org preprint supplement (doi:10.20944/preprints202004.0433.v1), 2020-05-06
Supplement: Supplementary file 1 [file supplementary]

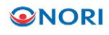

## PERMISSION LETTER FOR DATA COLLECTION

Hina Rehman  
Student  
Department of Biotechnology  
Univeristy of Malakand  
Chakdara, KP, Pakistan  
[Hina.rehman@uom.edu.pk](mailto:Hina.rehman@uom.edu.pk)  
Phone# +923457649682

ref/01/00266MM

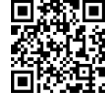

Subject: Permission for data collection followed by an intervention program for research work.

It is approved the request of Hina Rehman for data acquisition in the hospital for her research work (prevalence of cancer in Khyber Pakhtunkhwa Pakistan). Miss. Hina Rehman will stay in the hospital from 01/01/2010 till 28/02/2010 for data collection.

The personal information of the subjects will be kept confidential.

Director  
Nuclear Medicine Oncology and Radiotherapy Institute (NORI)

Signature

Phone# +92 51 9260611  
Email: [nori@noripaec.pk](mailto:nori@noripaec.pk)

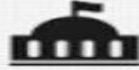

Governmental & Military

**IRNUM**

**PERMISSION LETTER FOR DATA COLLECTION**

Hina Rehman  
Student  
Department of Biotechnology  
Univeristy of Malakand  
Chakdara, KP, Pakistan  
[Hina.rehman@uom.edu.pk](mailto:Hina.rehman@uom.edu.pk)  
Phone# +923457649682

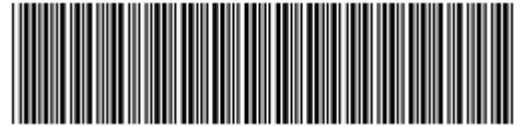

Subject: Permission for data collection followed by an intervention program for research work.

It is approved the request of Hina Rehman for data acquisition in the hospital for her research work (prevalence of cancer in Khyber Pakhtunkhwa Pakistan). Miss. Hina Rehman will stay in the hospital from 13/05/2010 till 15/06/2010 for data collection.

The personal information of the subjects will be kept confidential.

Director  
Institute of Radiotherapy and Nuclear Medicine (IRNUM)

Signature

Phone: +92 91 9222154

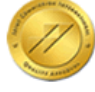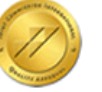

## PERMISSION LETTER FOR DATA COLLECTION

Hina Rehman  
Student  
Department of Biotechnology  
Univeristy of Malakand  
Chakdara, KP, Pakistan  
[Hina.rehman@uom.edu.pk](mailto:Hina.rehman@uom.edu.pk)  
Phone# +923457649682

Ref/xx/45T2k10

Subject: Permission for data collection followed by an intervention program for research work.

It is approved the request of Hina Rehman for data acquisition in the hospital for her research work (prevalence of cancer in Khyber Pakhtunkhwa Pakistan). Miss. Hina Rehman will stay in the hospital from 03/03/2010 till 30/04/2010 for data collection.

The personal information of the subjects will be kept confidential.

Director  
Shaukat Khanum Memorial Cancer Hospital and Research Centre (SKMCH&RC)

Signature

Phone# +92 42 35905000

Email: [skdcmanager@skm.org.pk](mailto:skdcmanager@skm.org.pk)
